# Supplementary material for: Fuzzy Self-tuned PID Controller for Virtual Inertia Control of Egyptian Power System Load Frequency Control Considering High Penetration of Renewable Energy
Source: Research Square preprint supplement (doi:10.21203/rs.3.rs-4344958/v1), 2024-05-10
Supplement: Supplementary file 1 [file 16cdc9a85c3d108ff726b240.docx]

Supplementary materials

All data generated or analyzed during this study are included in this published article and its supplementary information files.
